# Supplementary material for: A “weak acid and weak base” type fluorescent probe for sensing pH: mechanism and application in living cells
Source: Royal Society of Chemistry journal article supplement (doi:10.1039/c9ra03203g), 2019-01-01
Supplement: c9ra03203g1.pdf [file c9ra03203g1.pdf]

## Electronic Supplementary Information

### **A “weak acid and weak base” type fluorescent probe for sensing pH: mechanism and application in living cells**

#### **Table of Contents:**

1.  $^1\text{H}$  NMR spectrum of the probe
2.  $^1\text{H}$  NMR spectrum of the probe ( $\delta$  7.0-11.8)
3.  $^{13}\text{C}$  NMR spectrum of the probe
4. HRMS spectra characterizations of probe
5. Response times at different pH
6. Cytotoxicity test
7.  $^1\text{H}$  NMR spectra of NDI in  $\text{DMSO-}d_6$  before and after the addition of hydrochloric acid or sodium hydroxide.
8. Density Functional Theory

## 1. $^1\text{H}$ NMR spectrum of the probe

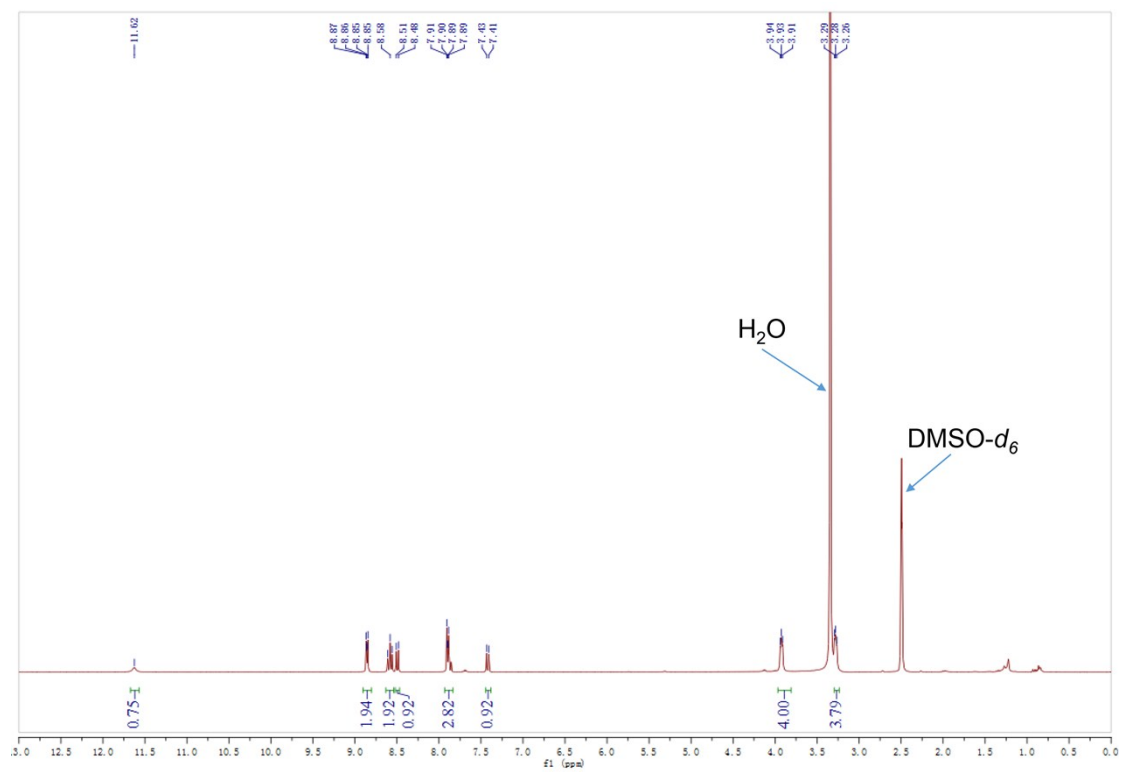

Fig.S1  $^1\text{H}$  NMR spectrum of probe in  $\text{DMSO-}d_6$

## 2. $^1\text{H}$ NMR spectrum of the probe ( $\delta$ 7.0-11.8)

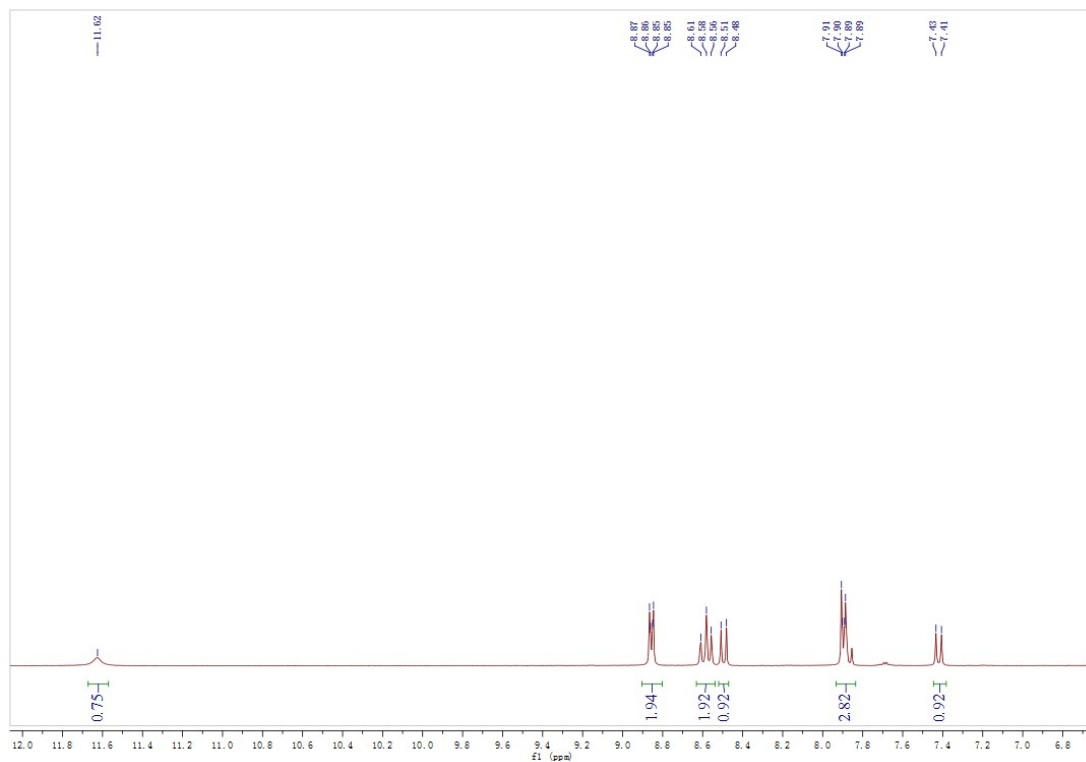

Fig.S2  $^1\text{H}$  NMR spectrum of probe in  $\text{DMSO-}d_6$  ( $\delta$  7.0-11.8)

### 3. $^{13}\text{C}$ NMR spectrum of the probe

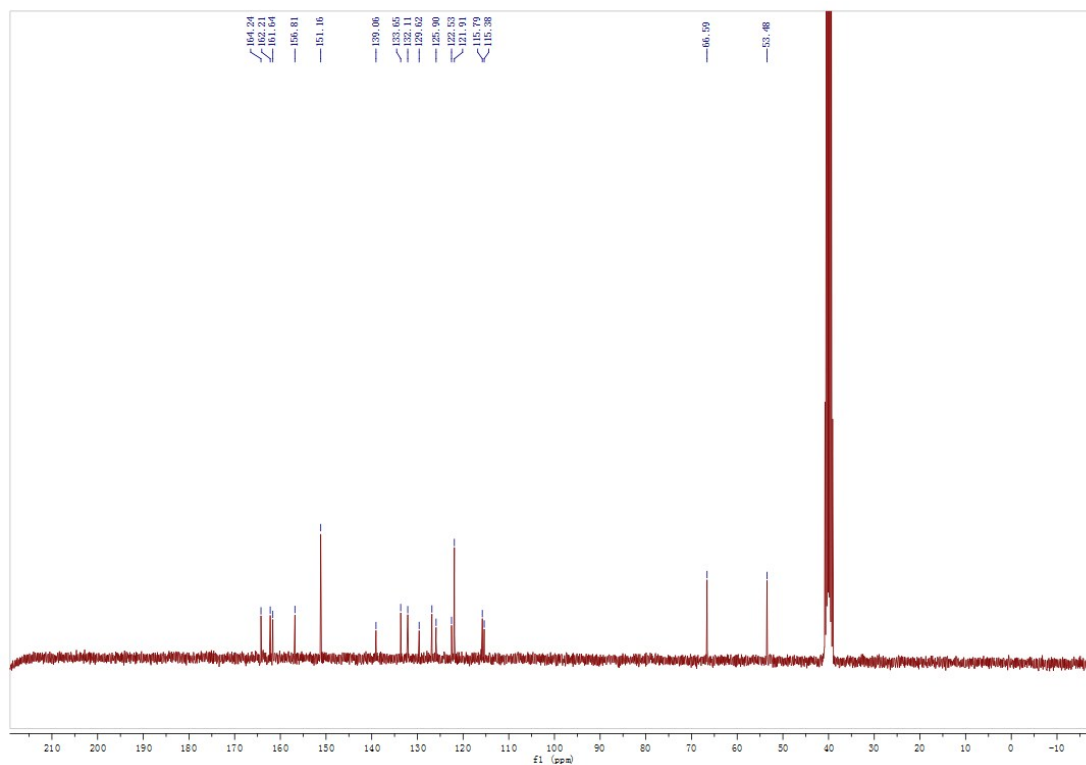

Fig.S3  $^{13}\text{C}$  NMR spectrum of probe in  $\text{DMSO-}d_6$

### 4. HRMS spectra characterizations of probe

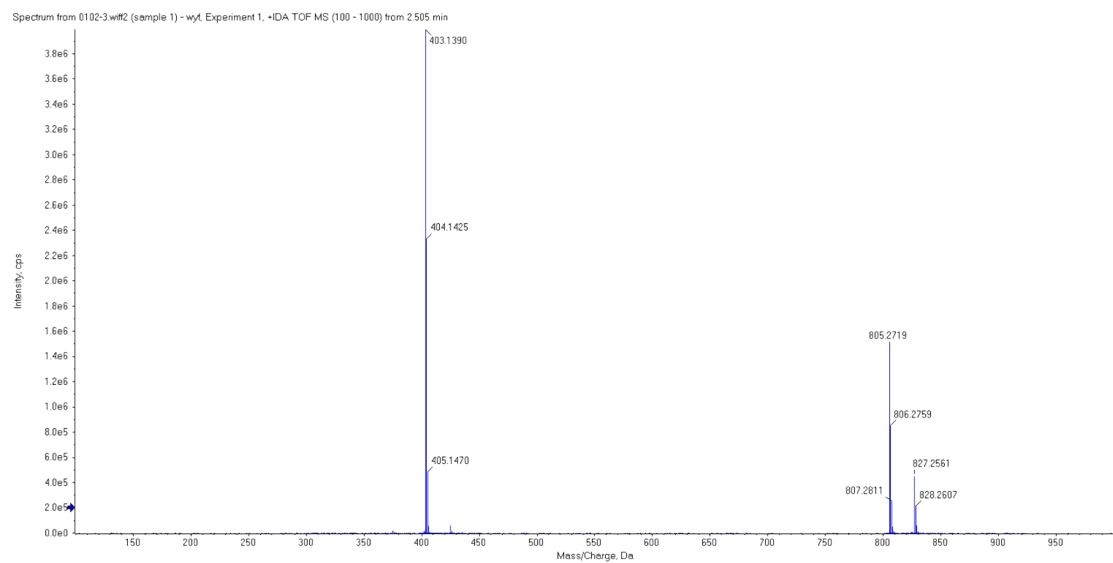

Fig.S4 Mass spectrum of probe

### 5. Response times at different pH

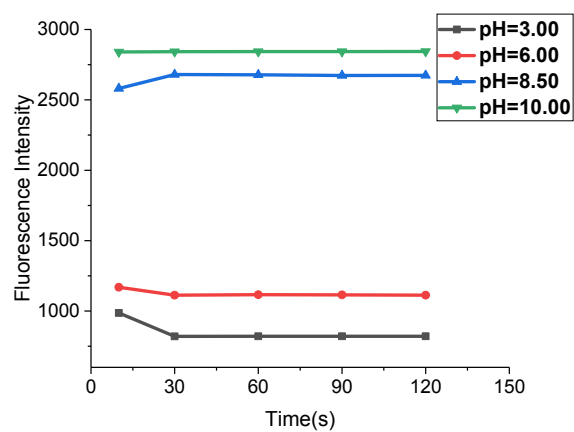

Fig.S5 Response times at different pH

### 6. Cytotoxicity test

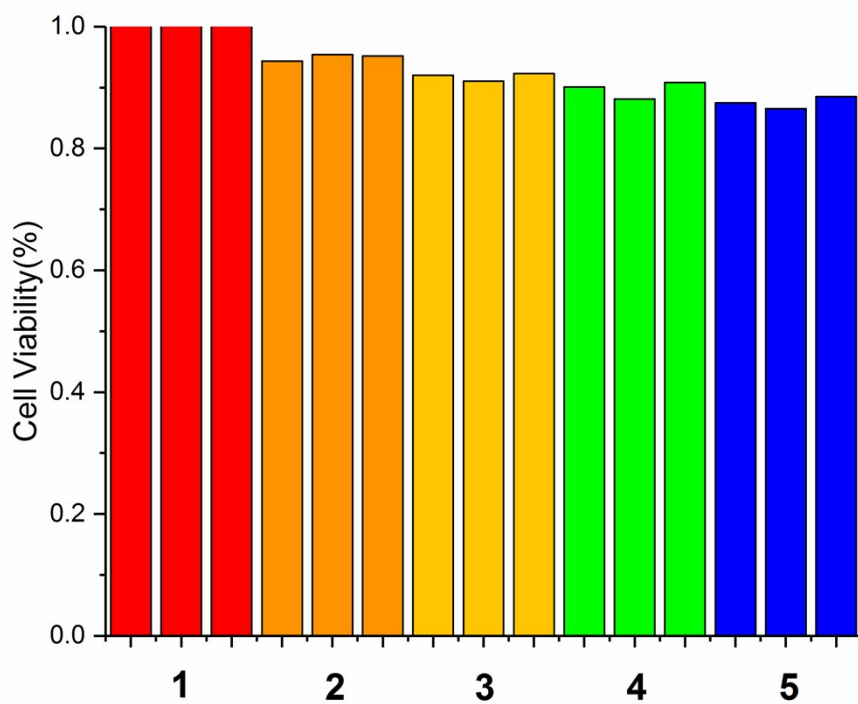

Fig.S6. MTT assay of HeLa cells treated in the presence of NDI (1. 0 $\mu$ M 2. 5 $\mu$ M 3. 10 $\mu$ M 4. 20 $\mu$ M 5. 30 $\mu$ M) and incubated for 24 hours. Each concentration group was repeated 3 times

**7.  $^1\text{H}$  NMR spectra of NDI in DMSO- $d_6$  before and after the addition of hydrochloric acid or sodium hydroxide.**

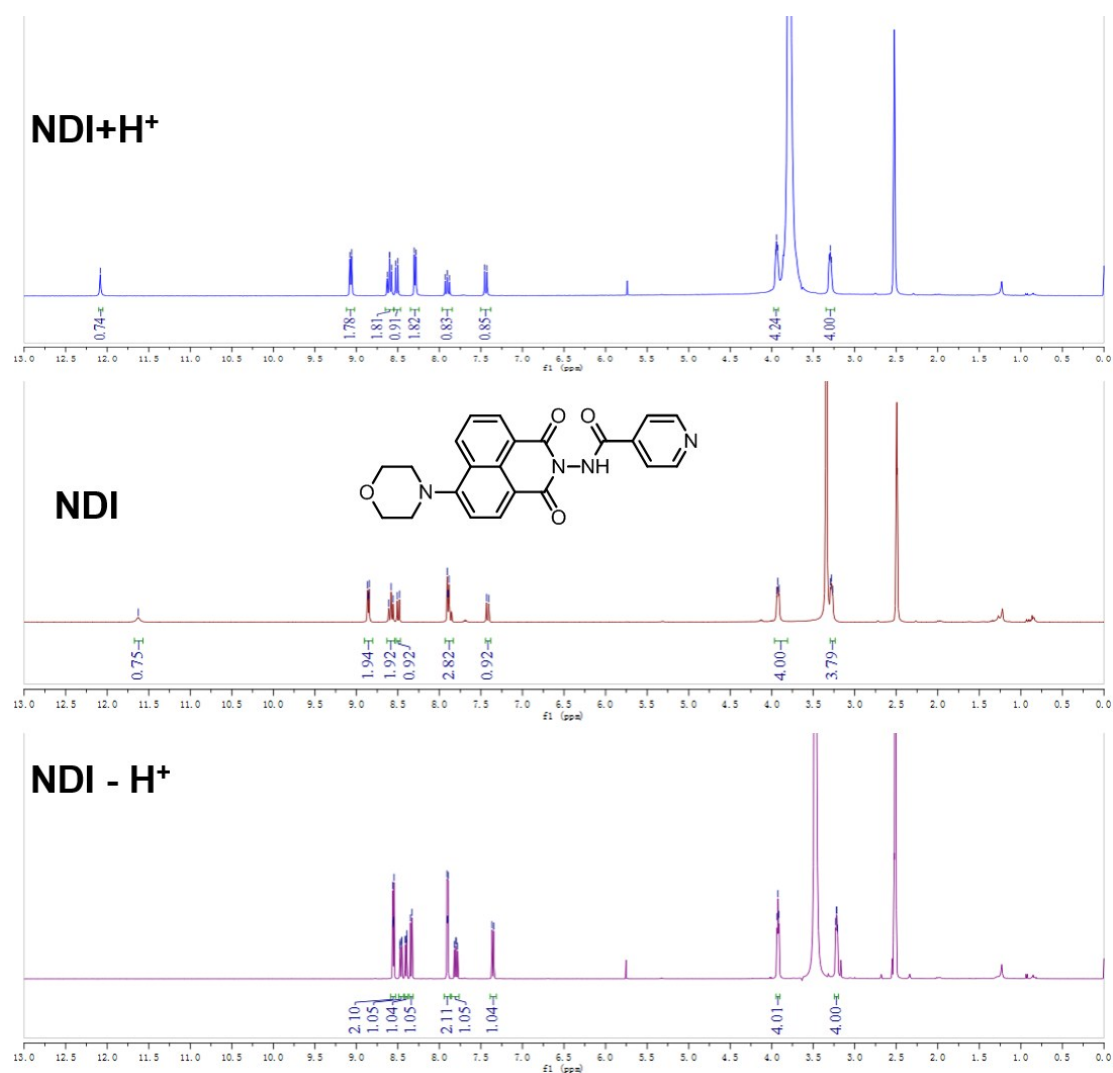

Fig.S7.  $^1\text{H}$  NMR spectra of NDI in  $\text{DMSO-}d_6$  before and after the addition of hydrochloric acid or sodium hydroxide.

## 8. Density Functional Theory

|                       | Electronic Transition | Energy (eV)    | $f$    | Composition <sup>a</sup> | CI <sup>b</sup> |
|-----------------------|-----------------------|----------------|--------|--------------------------|-----------------|
| NDI                   | $S_0 \rightarrow S_1$ | 3.00 (413 nm)  | 0.3254 | H-L                      | 0.6975          |
|                       | $S_0 \rightarrow S_2$ | 3.75 (331 nm)  | 0.0013 | H-L+1                    | 0.7047          |
| [NDI+H <sup>+</sup> ] | $S_0 \rightarrow S_1$ | 2.342 (529 nm) | 0.0001 | H-L                      | 0.7058          |
|                       | $S_0 \rightarrow S_2$ | 2.980 (416 nm) | 0.3274 | H-L+1                    | 0.6975          |
| [NDI-H <sup>+</sup> ] | $S_0 \rightarrow S_1$ | 2.719 (456 nm) | 0.0005 | H-L                      | 0.7015          |
|                       | $S_0 \rightarrow S_2$ | 2.877 (431 nm) | 0.0231 | H-1-L                    | 0.6903          |
|                       | $S_0 \rightarrow S_3$ | 3.145 (394 nm) | 0.3133 | H-2-L                    | 0.6855          |

a H=HOMO, L= LUMO, L+1=LUMO+1, H-1=HOMO-1, etc.

b CI coefficients are in absolute values. Only the main configurations are presented (CI

coefficients > 0.2).

**Table 1.** Electronic Excitation Energies (eV), Corresponding Oscillator Strength (f), Main Configurations and CI coefficients for NDI, [NDI+H<sup>+</sup>] and [NDI-H<sup>+</sup>]. Calculated at the TD-PCM-B3LYP/6-31G\*\*/B3LYP/6-31G\* level.
